# Supplementary material
Source: PubMed Central journal article supplement (PMC7657664)
Supplement: NIHMS1627825-supplement-1.pdf [file NIHMS1627825-supplement-1.pdf]

## Supplementary Information

**Supplementary Table 1.** Regulated lipophilic toxin composition and nAChR-inhibition binding of shellfish provided by Agri-food and Biosciences Institute

| Sample         | OA Group<br>(µg/kg) |        |       | YTX Group<br>(µg/kg) |       |              |                 | AZA Group<br>(µg/kg) |       | STX | DA | Inh, binding<br>(%)<br><br>mean ± SEM |
|----------------|---------------------|--------|-------|----------------------|-------|--------------|-----------------|----------------------|-------|-----|----|---------------------------------------|
|                | OA                  | DTX1   | DTX2  | YTX                  | h-YTX | 45-OH<br>YTX | 45-OH-<br>h-YTX | AZA1                 | AZA2  |     |    |                                       |
| <b>AFBI-01</b> | 169,3               | 71,0   | 185,2 | 133,0                |       | 126,6        |                 | >2000                | >5000 |     |    | 93,0 ± 1,8                            |
| <b>AFBI-02</b> | 59,2                | 9,1    | 19,3  | 18,5                 |       | 14,9         |                 |                      |       |     |    | 89,2 ± 1,7                            |
| <b>AFBI-03</b> | 1361,8              | 1047,8 |       | 14,4                 |       |              |                 |                      |       |     |    | 68,3 ± 5,0                            |
| <b>AFBI-04</b> | 90,1                | 22,1   | 31,3  |                      |       | 31,0         |                 |                      |       |     |    | 99,5 ± 0,1                            |
| <b>AFBI-05</b> | 18,4                |        |       | 298,8                | 5606  | 259,1        | 1717            |                      |       |     |    | 99,1 ± 0,2                            |
| <b>AFBI-06</b> | 28,3                | 12,4   | 38,0  | 18,1                 |       | 19,1         |                 |                      |       |     |    | 70,5 ± 4,0                            |
| <b>AFBI-07</b> | 163,8               | 16,7   | 265,0 | 22,0                 |       | 14,1         |                 |                      |       |     |    | 24,5 ± 2,9                            |
| <b>AFBI-08</b> | 20,3                |        |       | 39,6                 |       | 19,1         |                 | 7.9                  | 11.1  |     |    | 98,5 ± 0,1                            |
| <b>AFBI-09</b> |                     |        |       |                      |       |              |                 |                      |       |     |    | 39,0 ± 2,6                            |
| <b>AFBI-10</b> |                     |        |       |                      |       |              |                 |                      |       |     |    | 81,7 ± 1,3                            |
| <b>AFBI-11</b> |                     |        |       |                      |       |              |                 |                      |       |     |    | 37,6 ± 2,2                            |
| <b>AFBI-12</b> |                     |        |       |                      |       |              |                 |                      |       |     |    | 38,5 ± 3,7                            |
| <b>AFBI-13</b> |                     |        |       |                      |       |              |                 |                      |       | +   |    | 29,8 ± 1,9                            |
| <b>AFBI-14</b> |                     |        |       |                      |       |              |                 |                      |       |     | +  | 35,9 ± 3,2                            |

Abbreviations : AFBI: Agri-food and Biosciences Institute; OA: okadaic acid; DTX: dinophysistoxin ; YTX: yessotoxin; h-YTX: homo-yessotoxin ; 45-OH YTX: 45-hydroxy-yessotoxin ; 45-OH h-YTX: 45-hydroxy homo-yessotoxin ; AZA: azaspiracid ; STX : saxitoxin; DA: domoic acid. Toxin quantification was performed by LC/MS. Inhibition binding was performed by microplate-receptor binding assay. Data are mean values ± SEM of sextuplicate assays of at least two independent experiments.

### SUPPLEMENTARY FIGURE 3

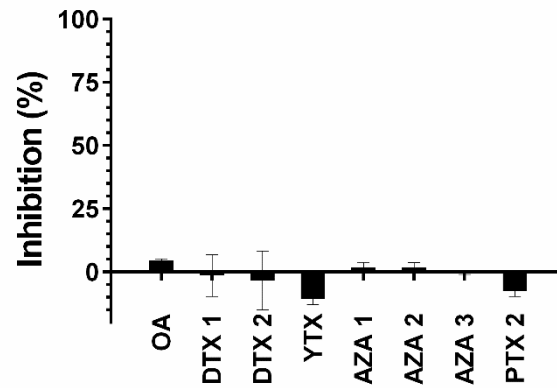

**Supplementary Figure 1.** Effect of regulated lipophilic marine neurotoxins on the performance of microplate receptor-binding assay. Inhibition of biotin- $\alpha$ -BgTx binding to *Torpedo*-nicotinic acetylcholine receptors in the presence of okadaic acid (OA), dinophysistoxins (DTX1 and DTX2), yessotoxin (YTX), azaspiracids (AZA1, AZA2 and AZA3) and palytoxin 2 (PTX2). Each toxin was tested at a concentration of 10  $\mu$ M. Each data plot represents the mean value  $\pm$  SEM of triplicate experiments.
